# Supplementary material
Source: publisher site journal article supplement (https://www.degruyter.com/publication/journal_key/JTIM/downloadAsset/JTIM_Editorial%20Policy.pdf)
Supplement: Supplementary file 1 [file JTIM_Editorial%20Policy.pdf]

# Journal of Translational Internal Medicine Editorial Policy

## Protection of Patients' Rights to Privacy

Identifying information should not be published in written descriptions, photographs, sonograms, CT scans, etc., and pedigrees unless the information is essential for scientific purposes and the patient (or parent or guardian, wherever applicable) gives written informed consent for publication. Authors should remove patients' names from figures unless they have obtained written informed consent from the patients. When informed consent has been obtained, it should be indicated in the article and copy of the consent should be attached with the covering letter.

## Statement of Human and Animal Rights

For research studies using human or animal subjects, the trial's design, conduct and reporting of results must conform to Good Clinical Practice guidelines (such as the Good Clinical Practice in Food and Drug Administration (FDA)-Regulated Clinical Trials (USA) or the Medical Research Council Guidelines for Good Clinical Practice in Clinical Trials (UK)) and/or to the World Medical Association (WMA) Declaration of Helsinki. Generally, we suggest that the national standard of the lead investigator be followed. If authors have any doubt as to whether the research was conducted in accordance with the above standards, the rationale for the chosen experimental approach must be clearly presented, along with a statement and proof of explicit approval given by the appropriate Institutional Review Board (IRB, for human subjects) and/or the Institutional Animal Care and Use Committee (IACUC, for animal subjects) for conducting the doubtful aspects of the study.

All research reports that are submitted for consideration of publication in a SMP journal must include statement(s) of proof that the appropriate approvals were obtained from the relevant IRB or research ethics committee. Any manuscript describing a study that used human subjects must include a statement that affirms the experiments were performed with prior informed consent (written or verbal, as appropriate) from each participant. All personal information must be anonymized prior to publication, unless a record of explicit consent from the involved patient(s) has been provided. Any manuscript describing a study that used animal subjects must include a statement in the Materials and Methods section (or text describing the experimental procedures) that affirms all appropriate measures were taken to minimize pain or discomfort, and details of the animals' care should be provided.

## **Informed Consent**

Any research article describing a study (clinical research and case report) involving humans should contain a statement in the title page clearly stating that all involved persons (subjects or legally authorized representative) gave their informed consent (written or verbal, as appropriate) prior to study inclusion. In general, SMP requires that any and all details that might disclose the identity of the subjects under study should be omitted or anonymized. In the rare situation that a study participant's identifiable information is crucial to the case presentation, the statement of informed consent is absolutely necessary, unless the participant is deceased. In addition, a copy of any approval document(s)/letter(s) or waiver should be provided to the SMP in PDF format.

## **Conflict of Interest**

A conflict-of-interest statement is required for all article and study types. In the interests of transparency and helping reviewers to assess any potential bias in a study's design, interpretation of its results or presentation of its scientific/medical content, the SMP requires all authors of each paper to declare any conflicting interests (including but not limited to commercial, personal, political, intellectual, or religious interests) in the title page that are related to the work submitted for consideration of publication. In addition, reviewers are required to indicate any potential conflicting interests they might have related to any particular paper they are asked to review.

## **Reprints and proofs**

Journal provides no free printed reprints. Authors can purchase reprints, payment for which should be done at the time of submitting the proofs.

## ***Publication schedule***

SMP publishes articles on its website immediately on acceptance and follows a 'continuous publication' schedule. Articles are compiled for 'print on demand' semiannual issues.

## **Manuscript submission, processing and publication charges**

SMP does not charge for submission or publication fee on article at present.

### **Copies of any permission(s)**

It is the responsibility of authors/ contributors to obtain permissions for reproducing any copyrighted material. A copy of the permission obtained must accompany the manuscript. Copies of any and all published articles or other manuscripts in preparation or submitted elsewhere that are related to the manuscript must also accompany the manuscript. The material should be sent to any of the two addresses given above.

### **Copyrights**

The entire contents of the SMP are protected under international copyrights. The Journal, however, grants to all users a free, irrevocable, worldwide, perpetual right of access to, and a license to copy, use, distribute, perform and display the work publicly and to make and distribute derivative works in any digital medium for any reasonable non-commercial purpose, subject to proper attribution of authorship and ownership of the rights. The journal also grants the right to make small numbers of printed copies for their personal non-commercial use under Creative Commons Attribution-Noncommercial-Share Alike 3.0 Unported License.

### **Advertising Policy**

Companies, publishers, hospitals, and societies related to the journal are welcome to submit their subscriptions for advertising. Advertising charges are different between journals due to their publishing style, quantity, frequency and subjects. SMP will check and verify if the products or companies are qualified in laws.

### **Academic Quality**

The academic quality of our publications is guaranteed and supervised by its sponsor(s) together with its editorial board. So the Society as well as the Editorial Board of each journal is responsible for the scientific quality. For example, the journal Endoscopic Ultrasound, it is the official journal of official journal of Euro-EUS Scientific Committee, Asia-Pacific EUS Task Force, Latin American Chapter of EUS, and International Society of EUS, which (together with the Editorial Board) are responsible for the scientific quality. In this case, SMP has strict requirements and process for the establishment of the Editorial Board.

### **Selection process for Editorial Board Members**

SMP uses an international rule to establish the Editorial Board of each journal. There may be some more requirements based on the standard rule. Generally, SMP has four steps to select the editorial board. Firstly, the Editor-in-Chief together with the publisher provides a list of nominated experts within the field based on their academic background. Secondly the Editor-in-Chief will talk or email to these experts to check if they are interested in such a job. Experts who are interested will be requested for detailed curriculum vitae. Thirdly, the sponsored society and the Editor-in-Chief will make a discussion to evaluate if they are qualified as a member based on the Editorial Board Requirements designed previously. Fourthly, experts who passed the evaluations will receive an official letter for this appointment. Members who are found with bad ethical problems will be excluded from the Board. Importantly, all members have the rights to know their roles and responsibilities for the journal. Therefore, all related documents will be sent to the appliers before the evaluation process is performed. By this the appliers will decide whether they are sufficient or have enough time to contribute to the journal.
